# Supplementary material for: One-step preparation of Cr2O3-based inks with long-term dispersion stability for inkjet applications
Source: Royal Society of Chemistry journal article supplement (doi:10.1039/d1na00244a), 2021-01-01

Supporting information

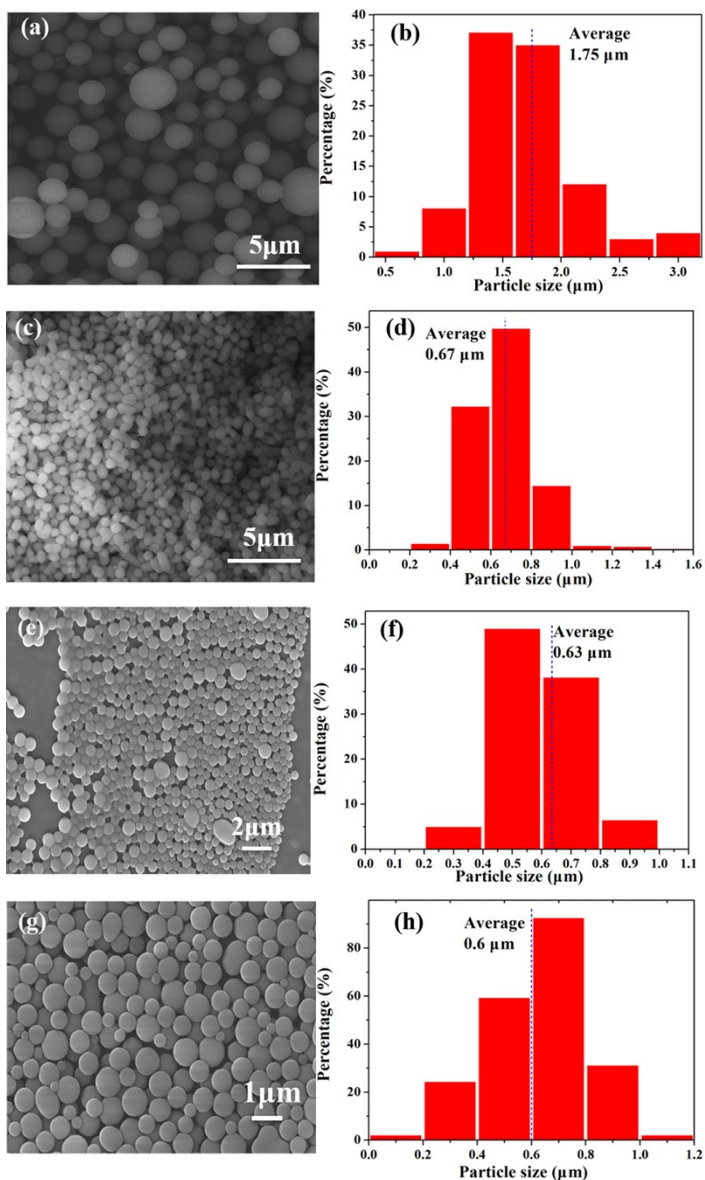

Fig. S1 SEM image of samples obtained at (a) 220 °C, (c) 210 °C, (e) 190 °C, (g) 180 °C and stereology particle size distribution of samples obtained at (b) 220 °C, (d) 210 °C, (f)

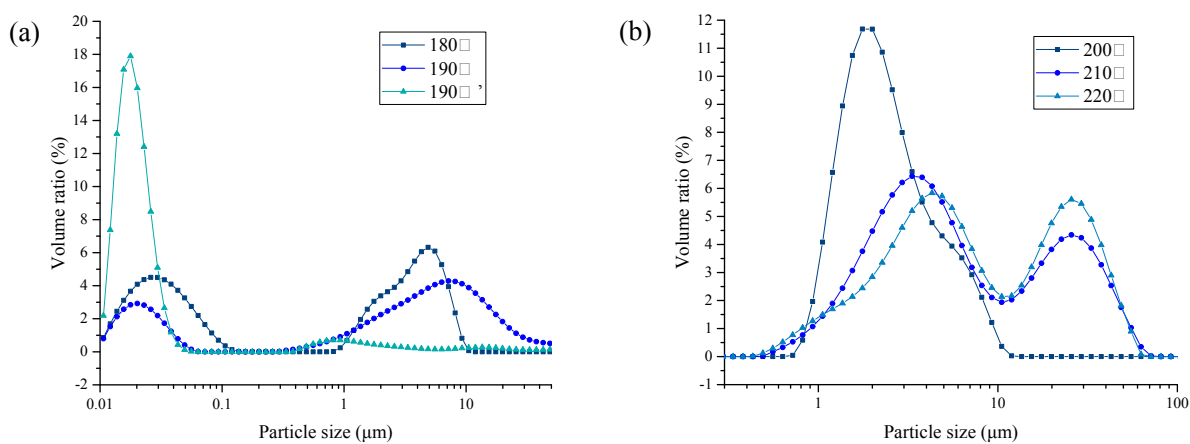

190 °C and (h) 180 °C.

Fig. S2 Laser diffraction particle size distribution of samples obtained at (a) 180 °C, 190 °C (b) 200 °C, 210 °C and 220 °C; The 190 °C' sample was tested in 1% v/v acetylacetone ethanol solution, while other samples were tested in pure ethanol.

Table. S1 Particle size distribution table of samples obtained at different temperature.

| Sample name | Dx (10) (μm) | Dx (50) (μm) | Dx (90) (μm) |
|-------------|--------------|--------------|--------------|
| 180 °C      | 0.019        | 1.617        | 5.971        |
| 190 °C      | 0.021        | 5.087        | 167.517      |
| 190 °C'     | 0.013        | 0.019        | 0.99         |
| 200 °C      | 1.253        | 2.223        | 5.569        |
| 210 °C      | 1.669        | 5.018        | 31.944       |
| 220 °C      | 1.717        | 6.555        | 33.211       |

Note: Dx(10), Dx(50) and Dx(90) is the particle size where the cumulative distribution percentage of the sample reaches 10%, 50% and 90%, and Dx(50) is usually used to indicate the average particle size of the powder.

Table. S2 XPS peak table of sample obtained by solvothermal method under 190 °C

| Name | Peak value (eV) | FWHM (eV) | Atomic (%) |
|------|-----------------|-----------|------------|
| C1s  | 284.69          | 2.47      | 56.76      |
| O1s  | 531.14          | 1.95      | 35.11      |
| Cr2p | 576.56          | 2.6       | 8.13       |

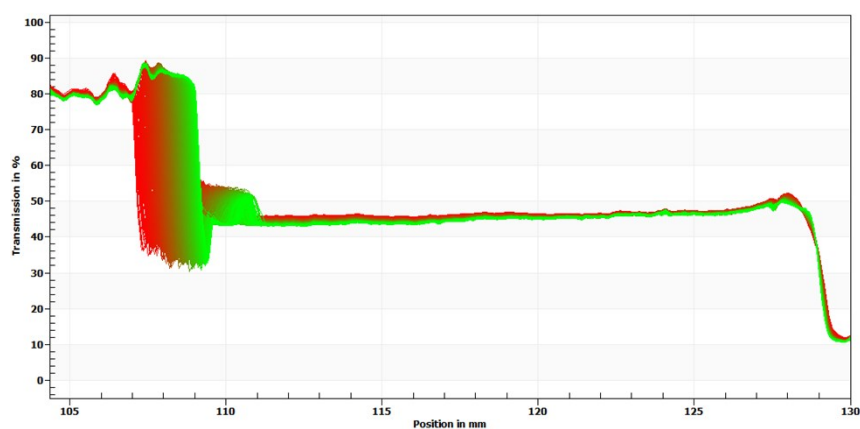

Fig. S3 Transmission vs. position profiles of samples obtained at 190 °C.

Fig. S4 Optical image of printed pattern on (a) PET with 1-6 times printing and (b) polyurethane layer coated nylon fabrics; (c) microscopy image of the yellow box in the previous image; (d) the SEM image of the ball-milled Cr<sub>2</sub>O<sub>3</sub> particles.

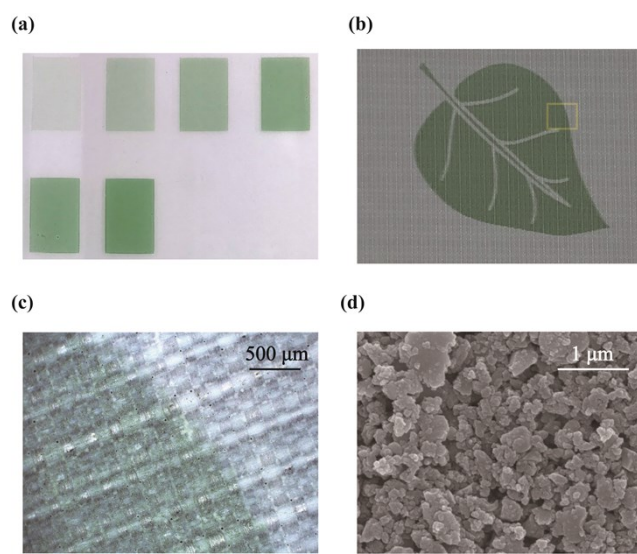

Supplement: d1na00244a1.pdf [file d1na00244a1.pdf]
